# Supplementary material
Source: HighWire-hosted journal article supplement (https://bmjopen.bmj.com/content/14/7/e078992)
Supplement: inline-supplementary-material-3 [file inline-supplementary-material-3.pdf]

Test statistics and p-value of non-linear association analysis

| Parameters                 | Statistics | <i>P</i> |
|----------------------------|------------|----------|
| WBC (× 10 <sup>9</sup> /L) | 9.51       | 0.023    |
| RDWCV (%)                  | 10.01      | 0.019    |
| PLT (×10 <sup>9</sup> /L)  | 6.08       | 0.108    |
| MPV ( fL)                  | 4.93       | 0.177    |
| PDW (fL)                   | 8.67       | 0.034    |
| PCT (%)                    | 8.92       | 0.030    |
